# Supplementary material
Source: PubMed Central journal article supplement (PMC5726306)
Supplement: NIHMS890588-supplement-supplement_1.pdf [file NIHMS890588-supplement-supplement_1.pdf]

### Supplemental Schematic: Timing of Observations for Hormone-Drinking Analyses

|   | STUDY DAY                                                                                    | 1              | 2              | 3              | 4              | 5              | 6              | 7              | 8              | 9              | 10             |
|---|----------------------------------------------------------------------------------------------|----------------|----------------|----------------|----------------|----------------|----------------|----------------|----------------|----------------|----------------|
| 1 | HORMONE OBSERVATION DAY                                                                      | A <sub>1</sub> |                | B <sub>1</sub> |                | C <sub>1</sub> |                | D <sub>1</sub> |                | E <sub>1</sub> |                |
| 2 | ALCOHOL OUTCOME DAY                                                                          |                | A <sub>2</sub> |                | B <sub>2</sub> |                | C <sub>2</sub> |                | D <sub>2</sub> |                | E <sub>2</sub> |
| 3 | DAY of ALCOHOL USE QUESTIONNAIRE RESPONSE<br><br>("How many drinks did you have yesterday?") |                |                | A <sub>3</sub> |                | B <sub>3</sub> |                | C <sub>3</sub> |                | D <sub>3</sub> |                |

**Hormone Levels Analyses.** Data collected for alcohol consumption was collected in the morning on day A<sub>3</sub> regarding alcohol use during the previous 24-hour period (A<sub>2</sub>). This results in a one day lag between the predictor of person-standardized hormone level (A<sub>1</sub>) and the outcome of alcohol consumption (A<sub>2</sub>).
